# Supplementary material for: DYNEELAX Robotic Arthrometer Reliability and Feasibility on Healthy and Anterior Cruciate Ligament Injured/Reconstructed Persons
Source: Hindawi journal article supplement (doi:10.1155/2024/3413466), 2024-04-15
Supplement: f1 [file 3413466.f1.zip]

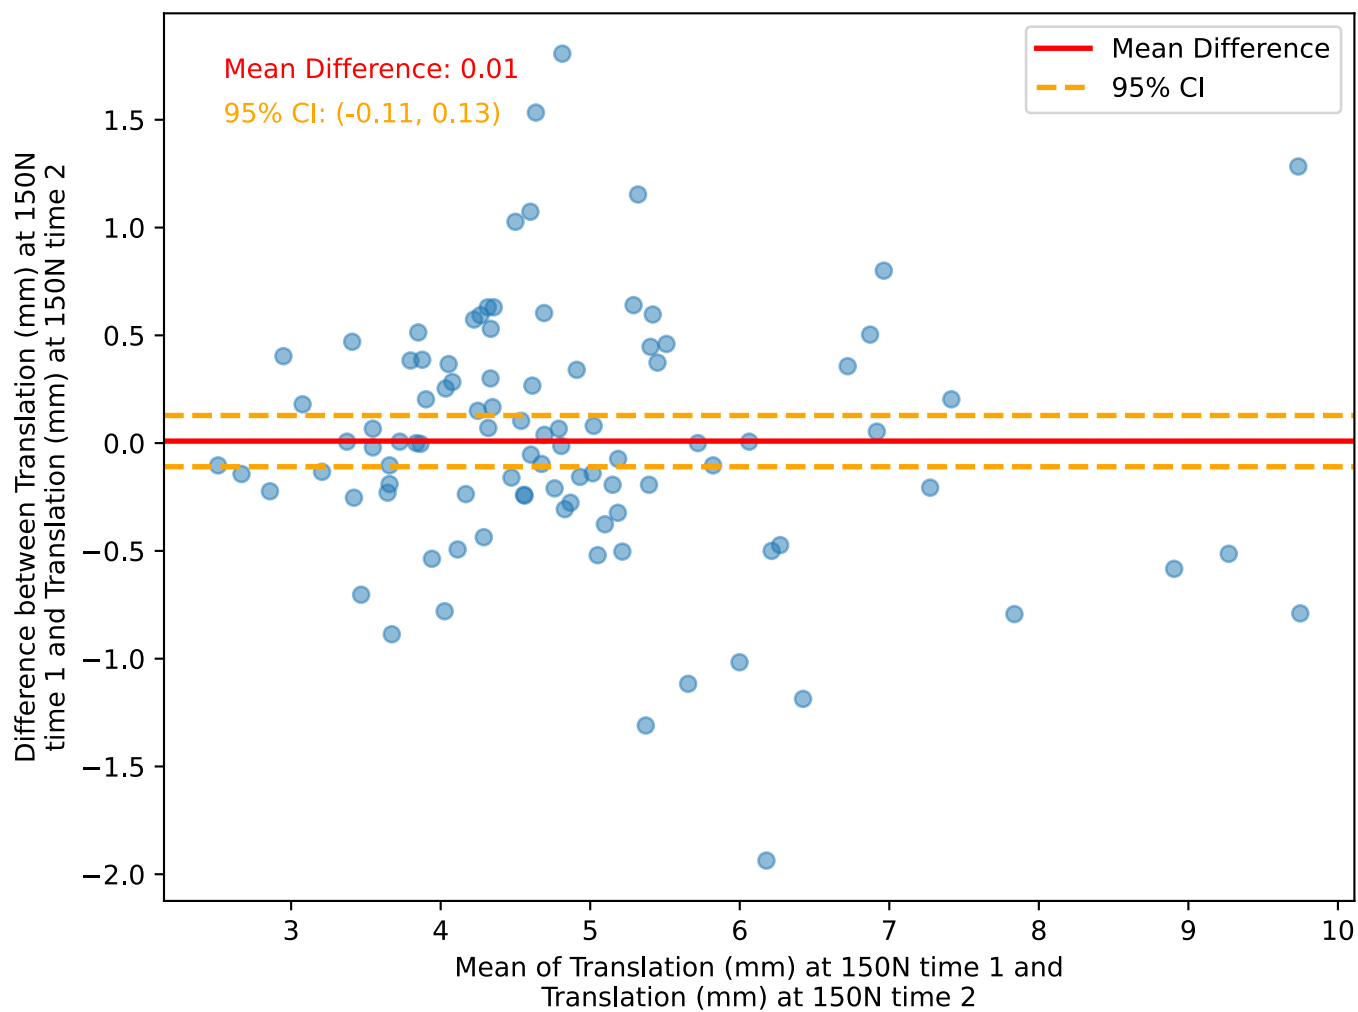

Supplementary Figure 01: Bland-Altman plot of tibial translation (mm) at 150N of applied force at the two time points.
