# Supplementary figures and images for: DYNEELAX Robotic Arthrometer Reliability and Feasibility on Healthy and Anterior Cruciate Ligament Injured/Reconstructed Persons
Source: Hindawi journal article supplement (doi:10.1155/2024/3413466), 2024-04-15

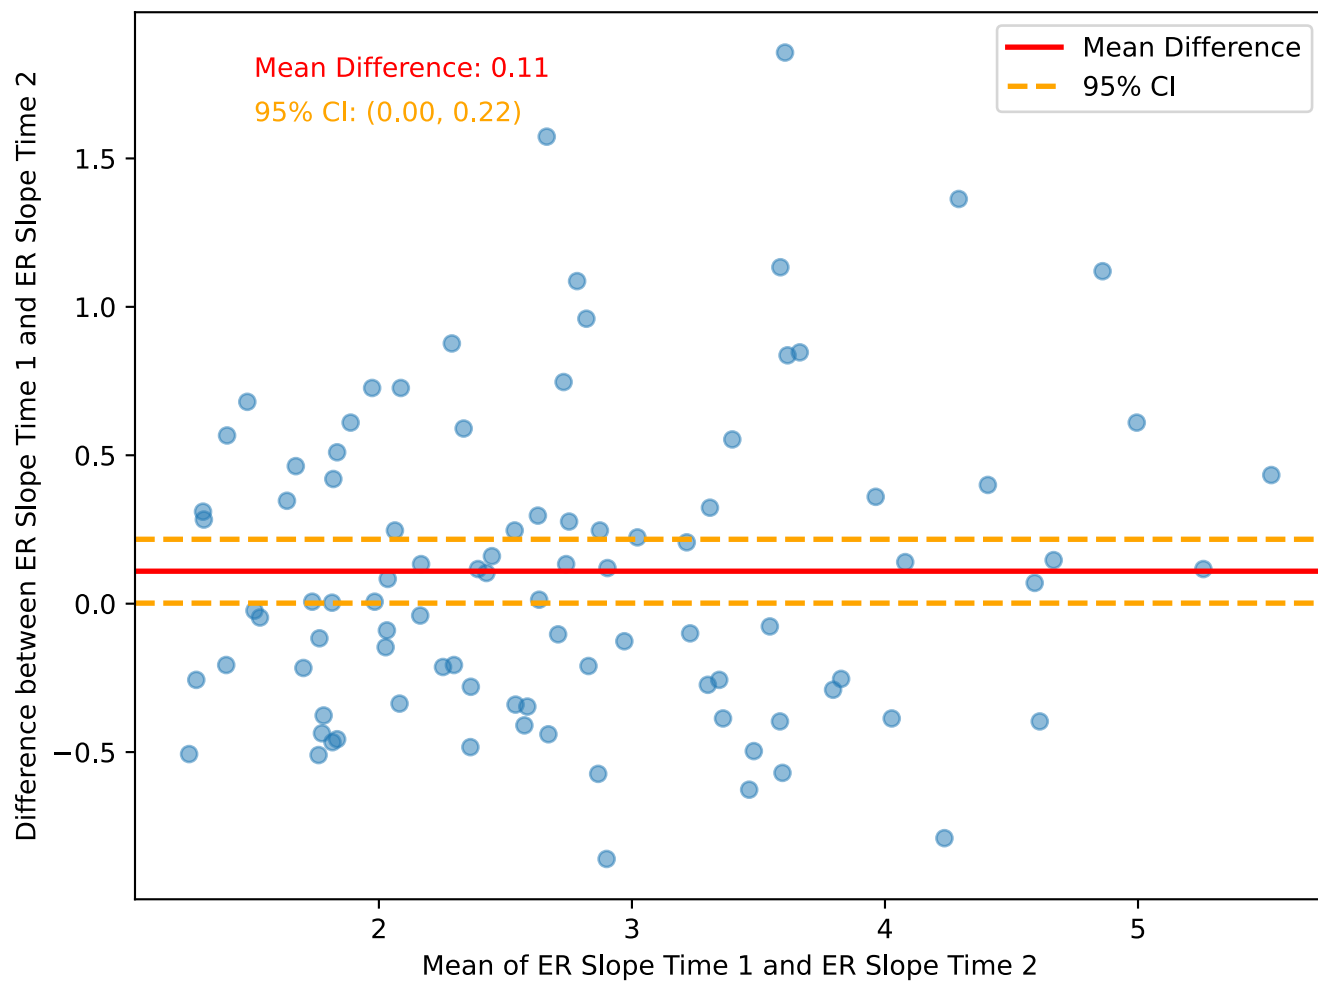

Supplementary Figure 13: Bland-Altman plot of ERSlope at the two time points.

Supplement: f1 [file 3413466.f1.zip]

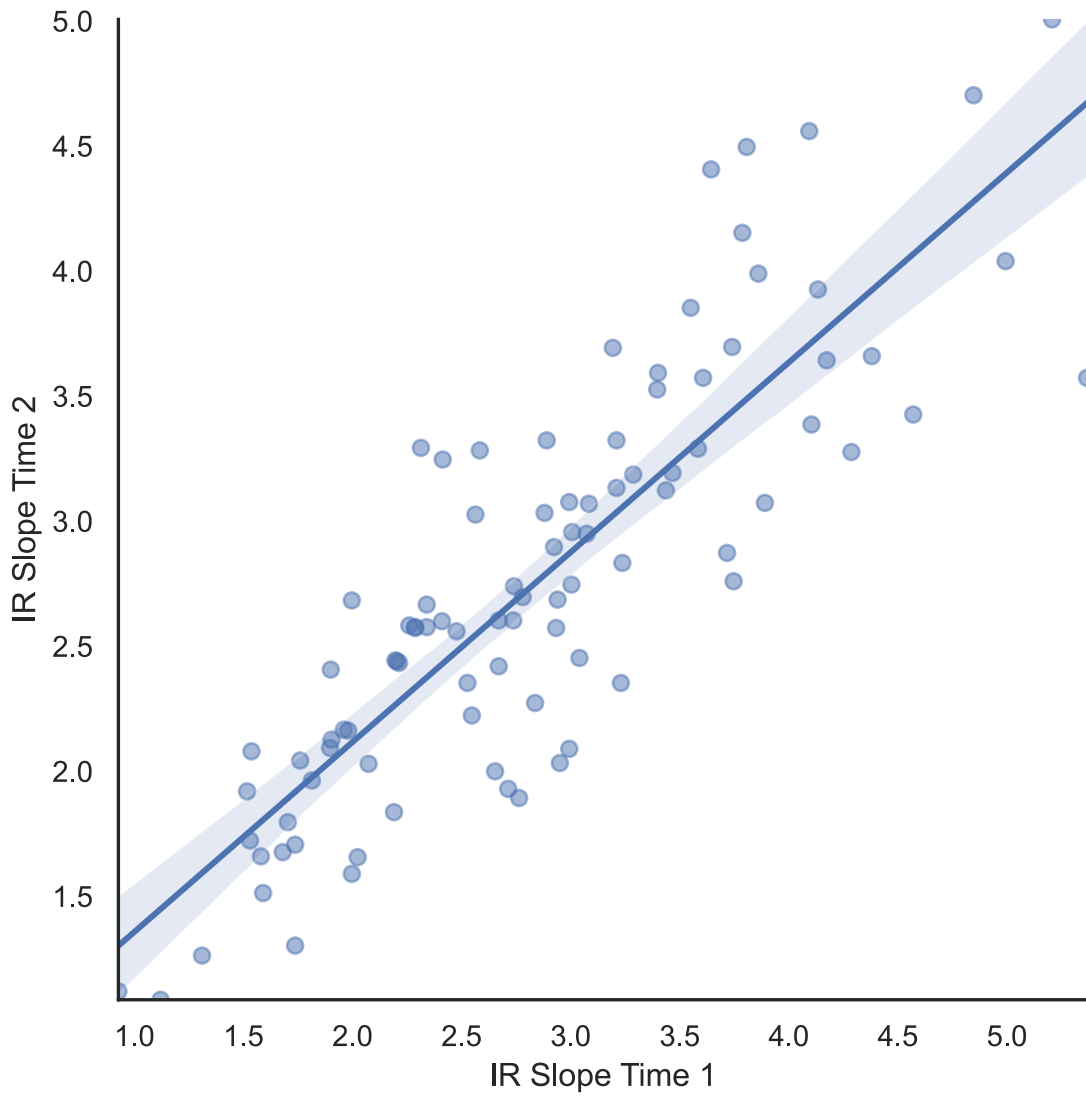

Supplementary Figure 12: Jointplot of IRSlope at the two time points.

Supplement: f1 [file 3413466.f1.zip]

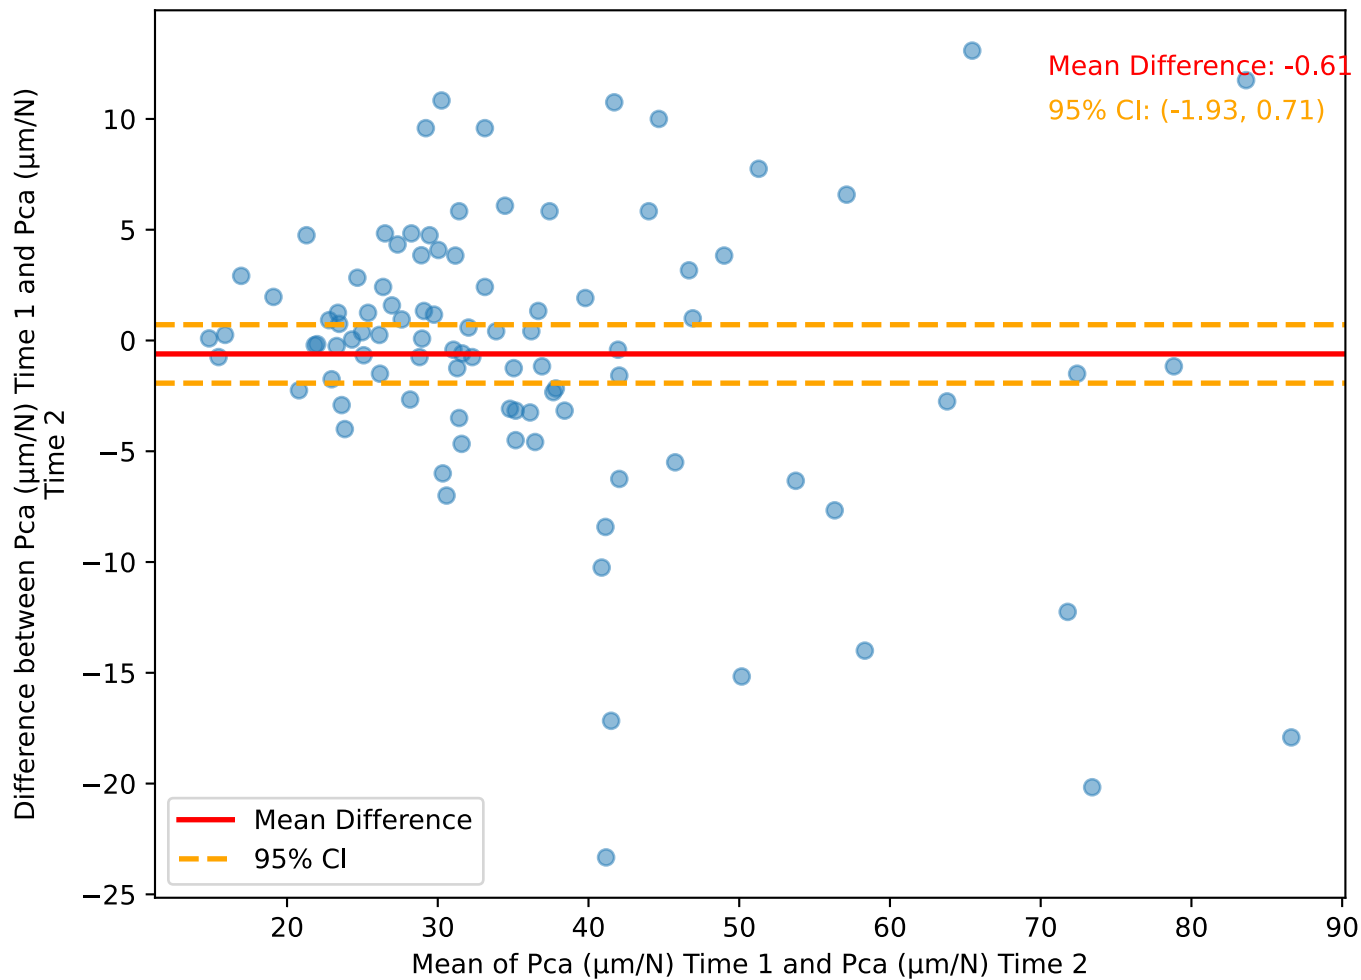

Supplementary Figure 07: Bland-Altman plot of PCa (μm/N) at 5N.m of applied torque at the two time points.

Supplement: f1 [file 3413466.f1.zip]

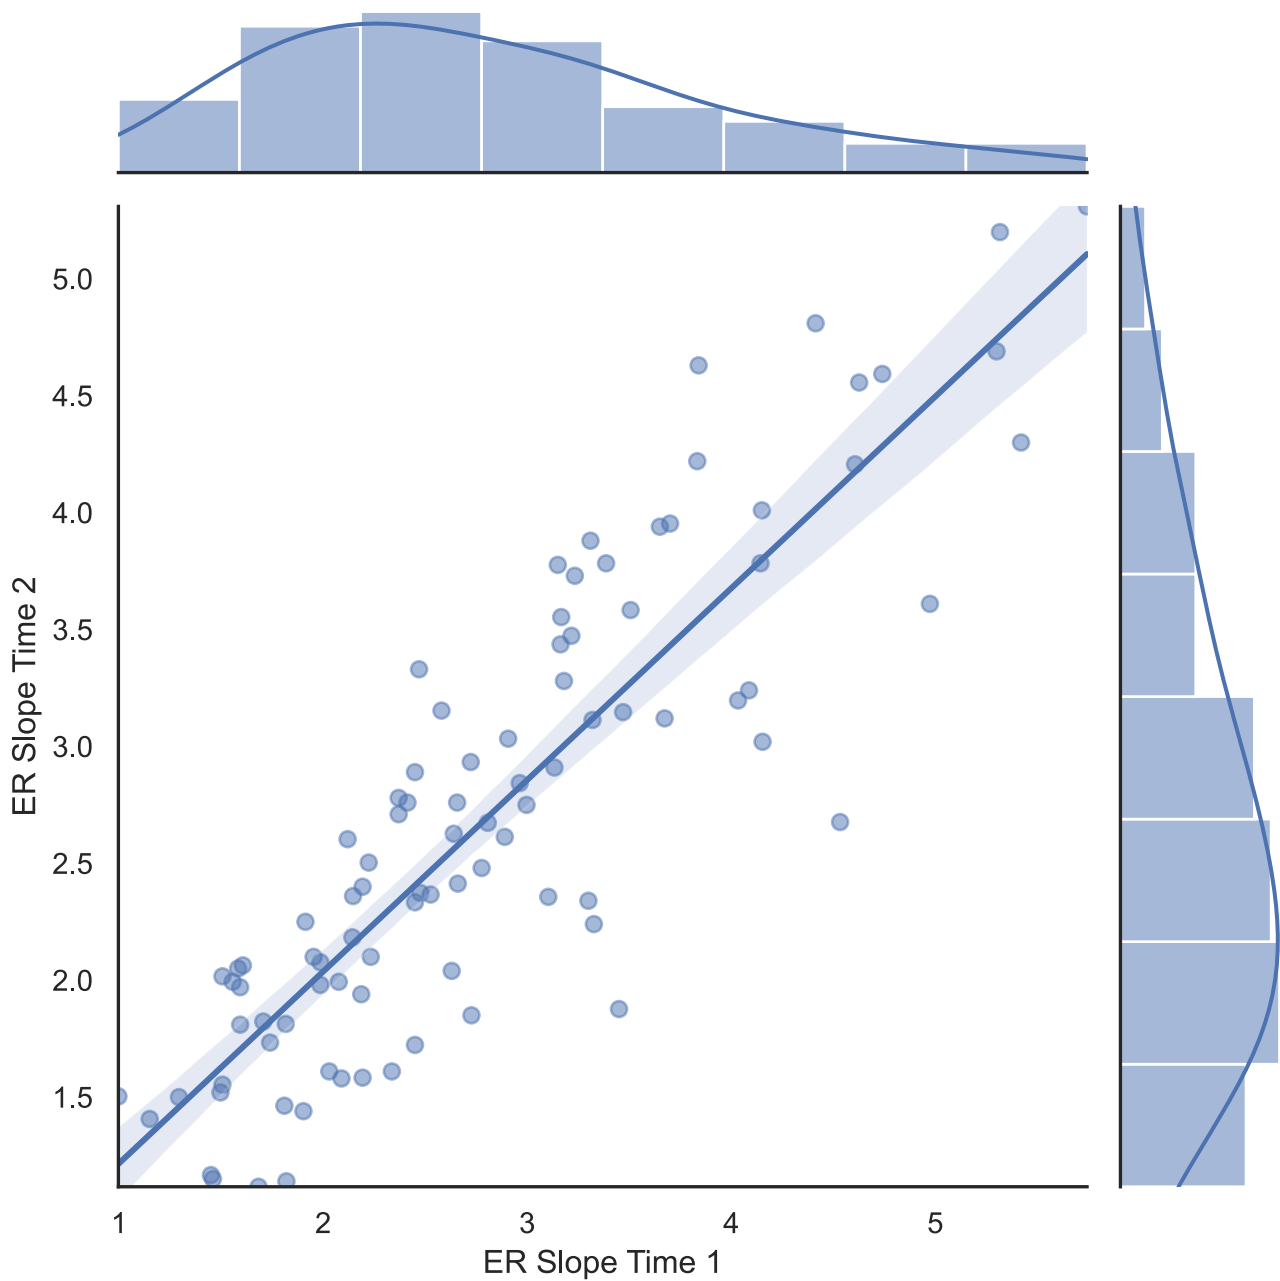

Supplementary Figure 14: Jointplot of ERSlope at the two time points.

Supplement: f1 [file 3413466.f1.zip]

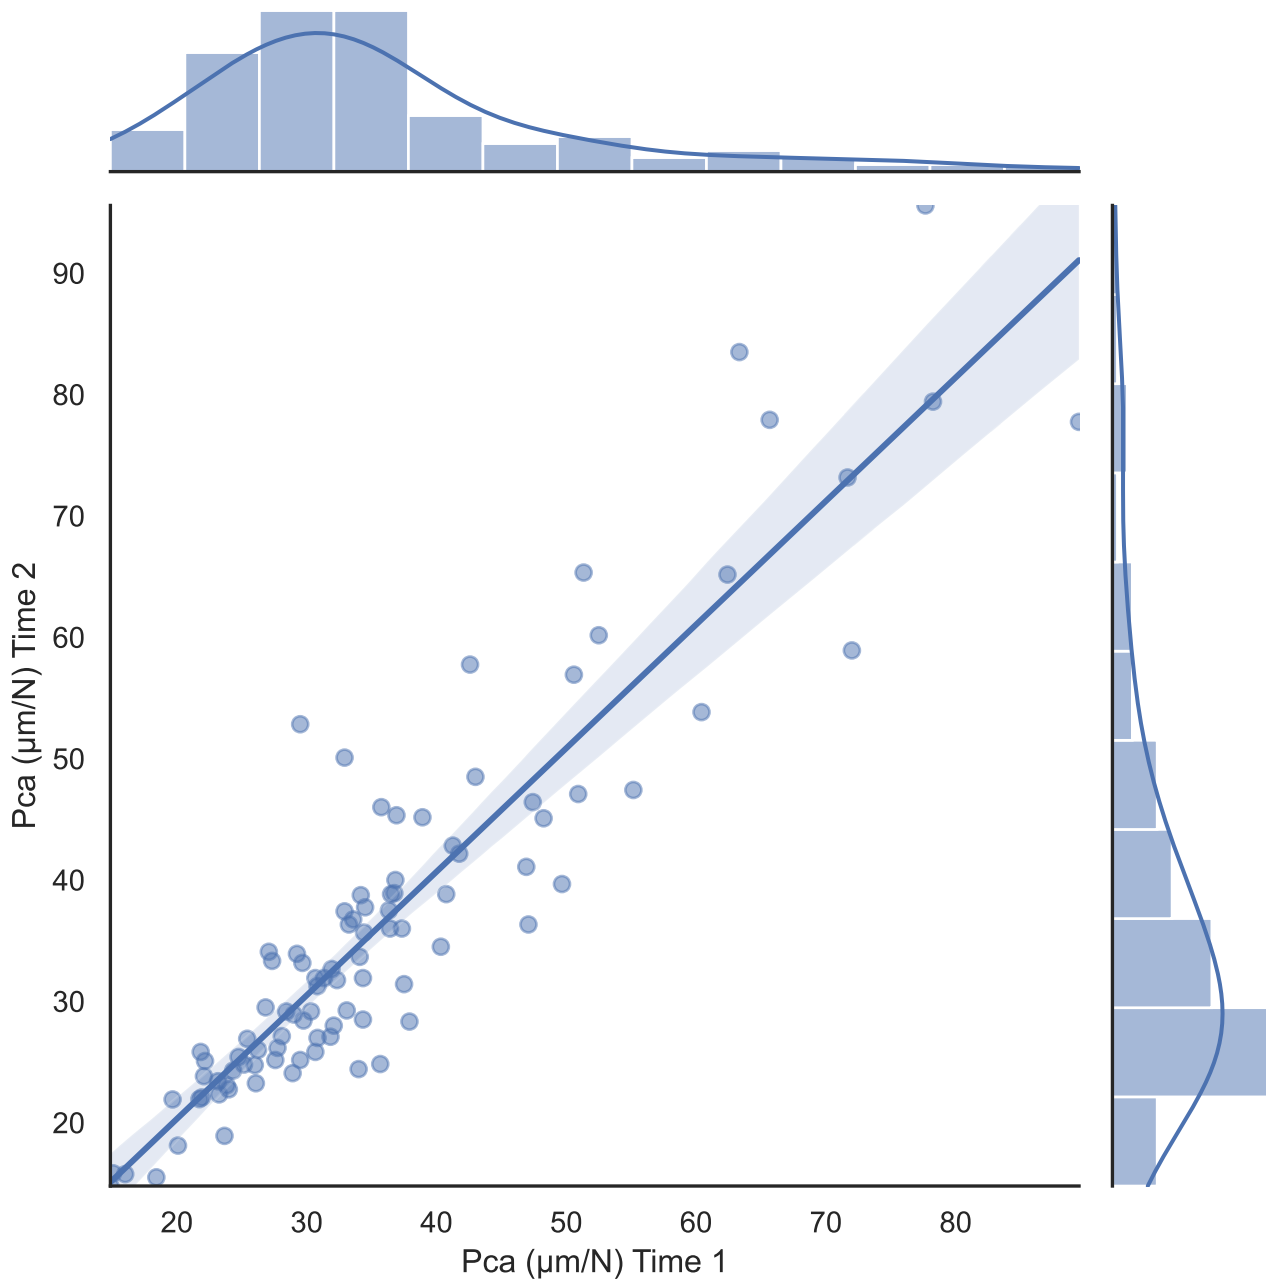

Supplementary Figure 08: Jointplot of PCa ( $\mu\text{m/N}$ ) at 5N.m of applied torque at the two time points.

Supplement: f1 [file 3413466.f1.zip]

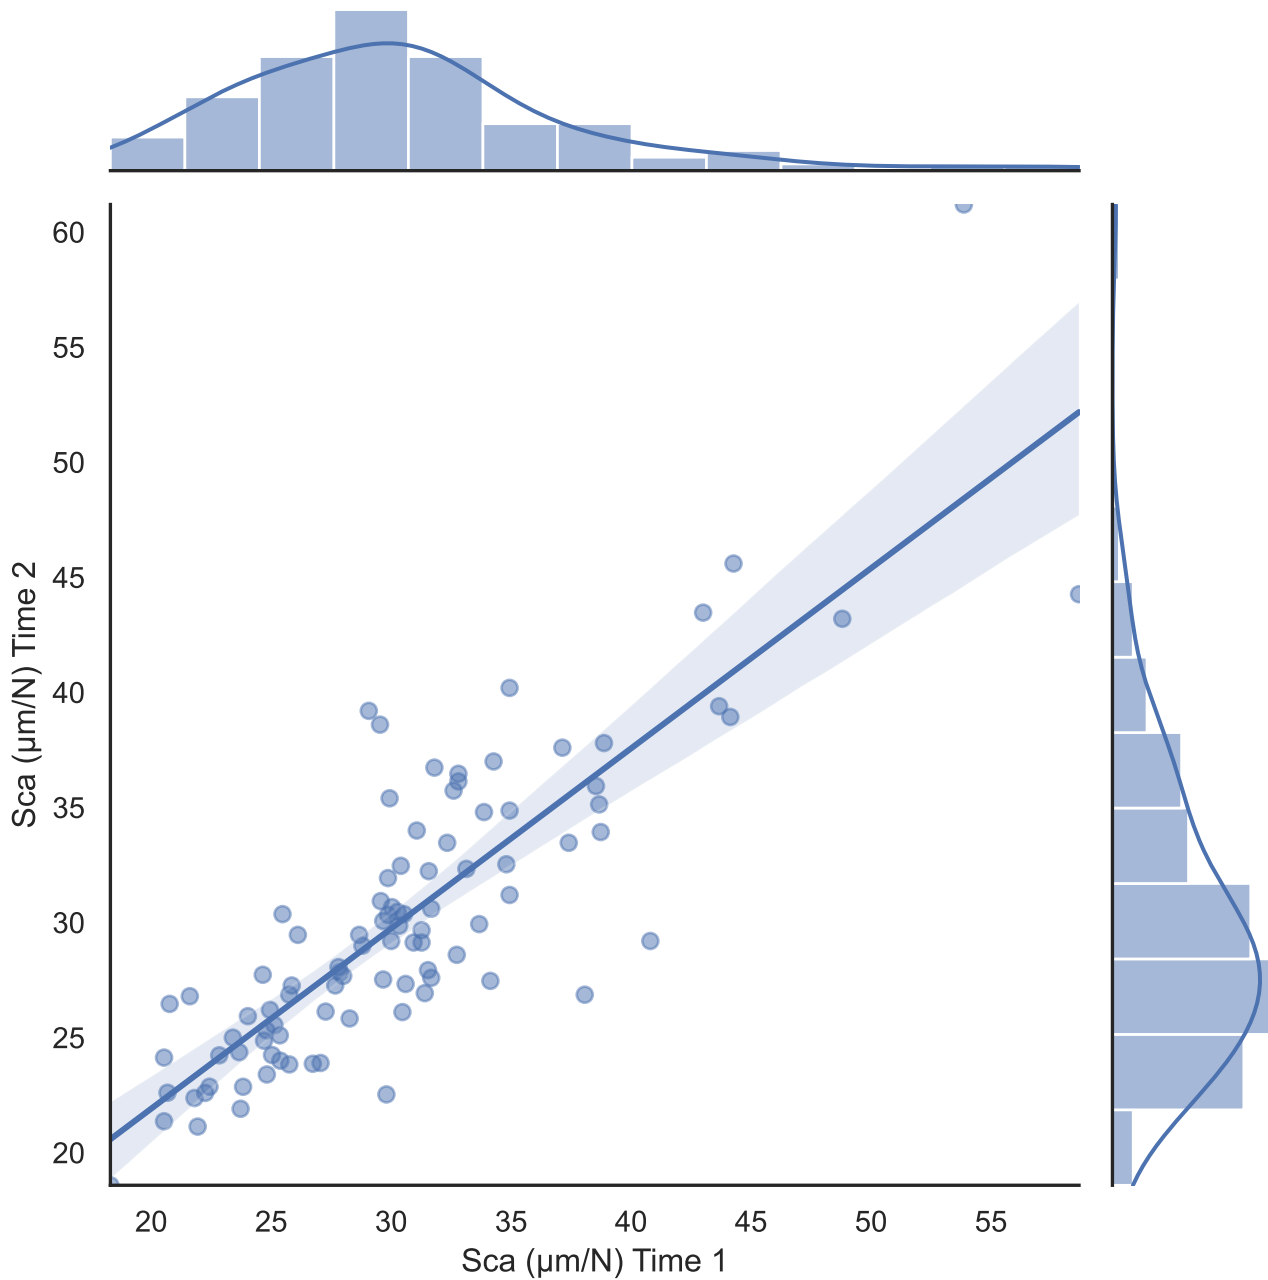

Supplementary Figure 10: Jointplot of SCa ( $\mu\text{m/N}$ ) at 5N.m of applied torque at the two time points.

Supplement: f1 [file 3413466.f1.zip]

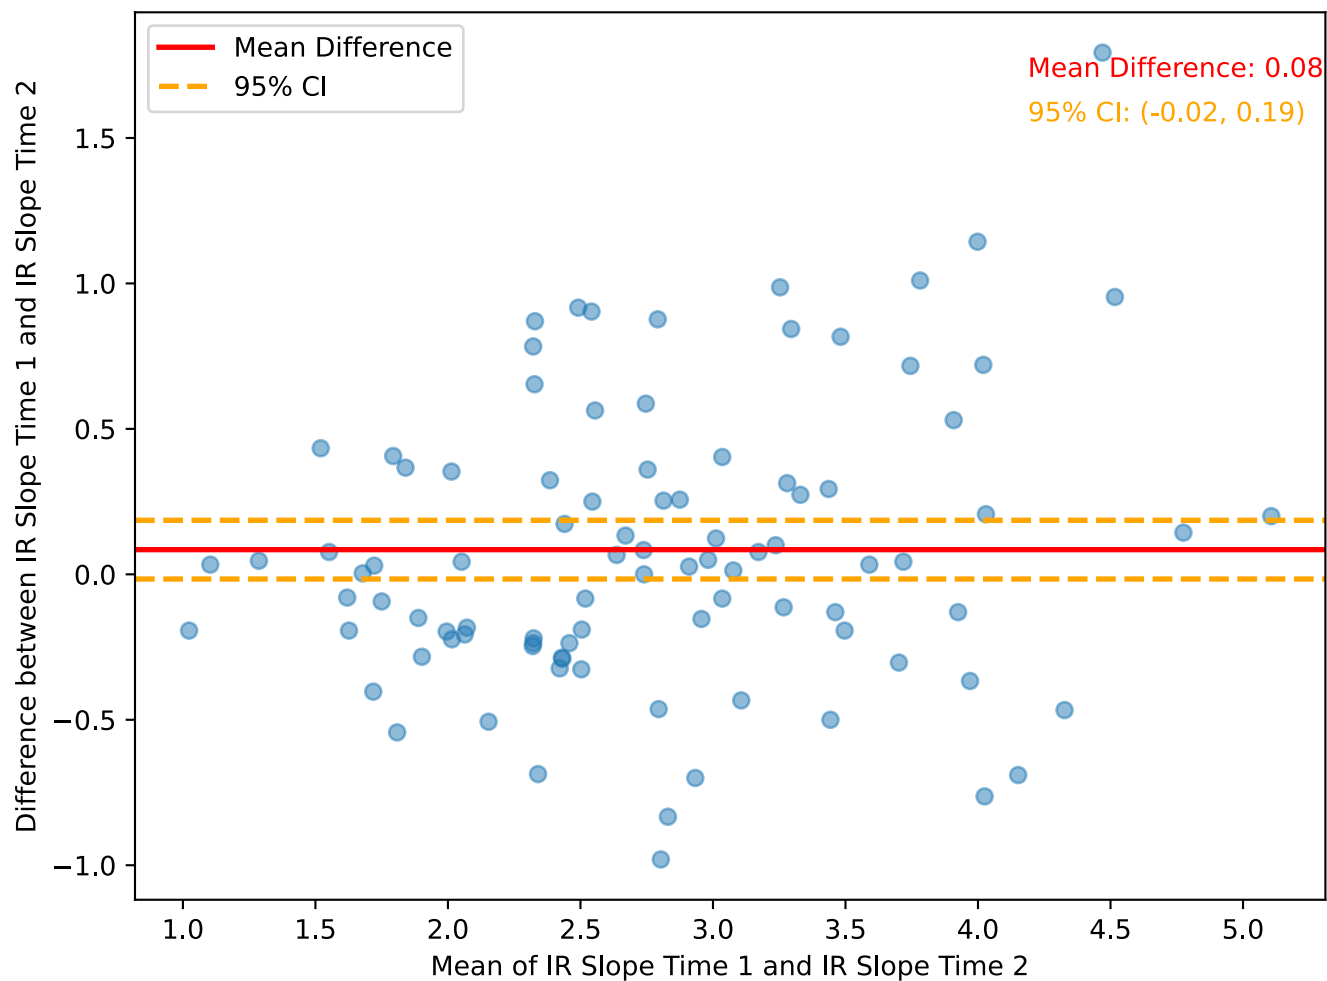

Supplementary Figure 11: Bland-Altman plot of IRSlope at the two time points.

Supplement: f1 [file 3413466.f1.zip]
